# Supplementary material for: The Impact of Carbohydrate Management on Coleoptile Elongation in Anaerobically Germinating Seeds of Rice (Oryza sativa L.) under Light and Dark Cycles
Source: MDPI journal article supplement (doi:10.3390/plants12071565), 2023-04-05
Supplement: s1 [file s1]

Supplementary Materials

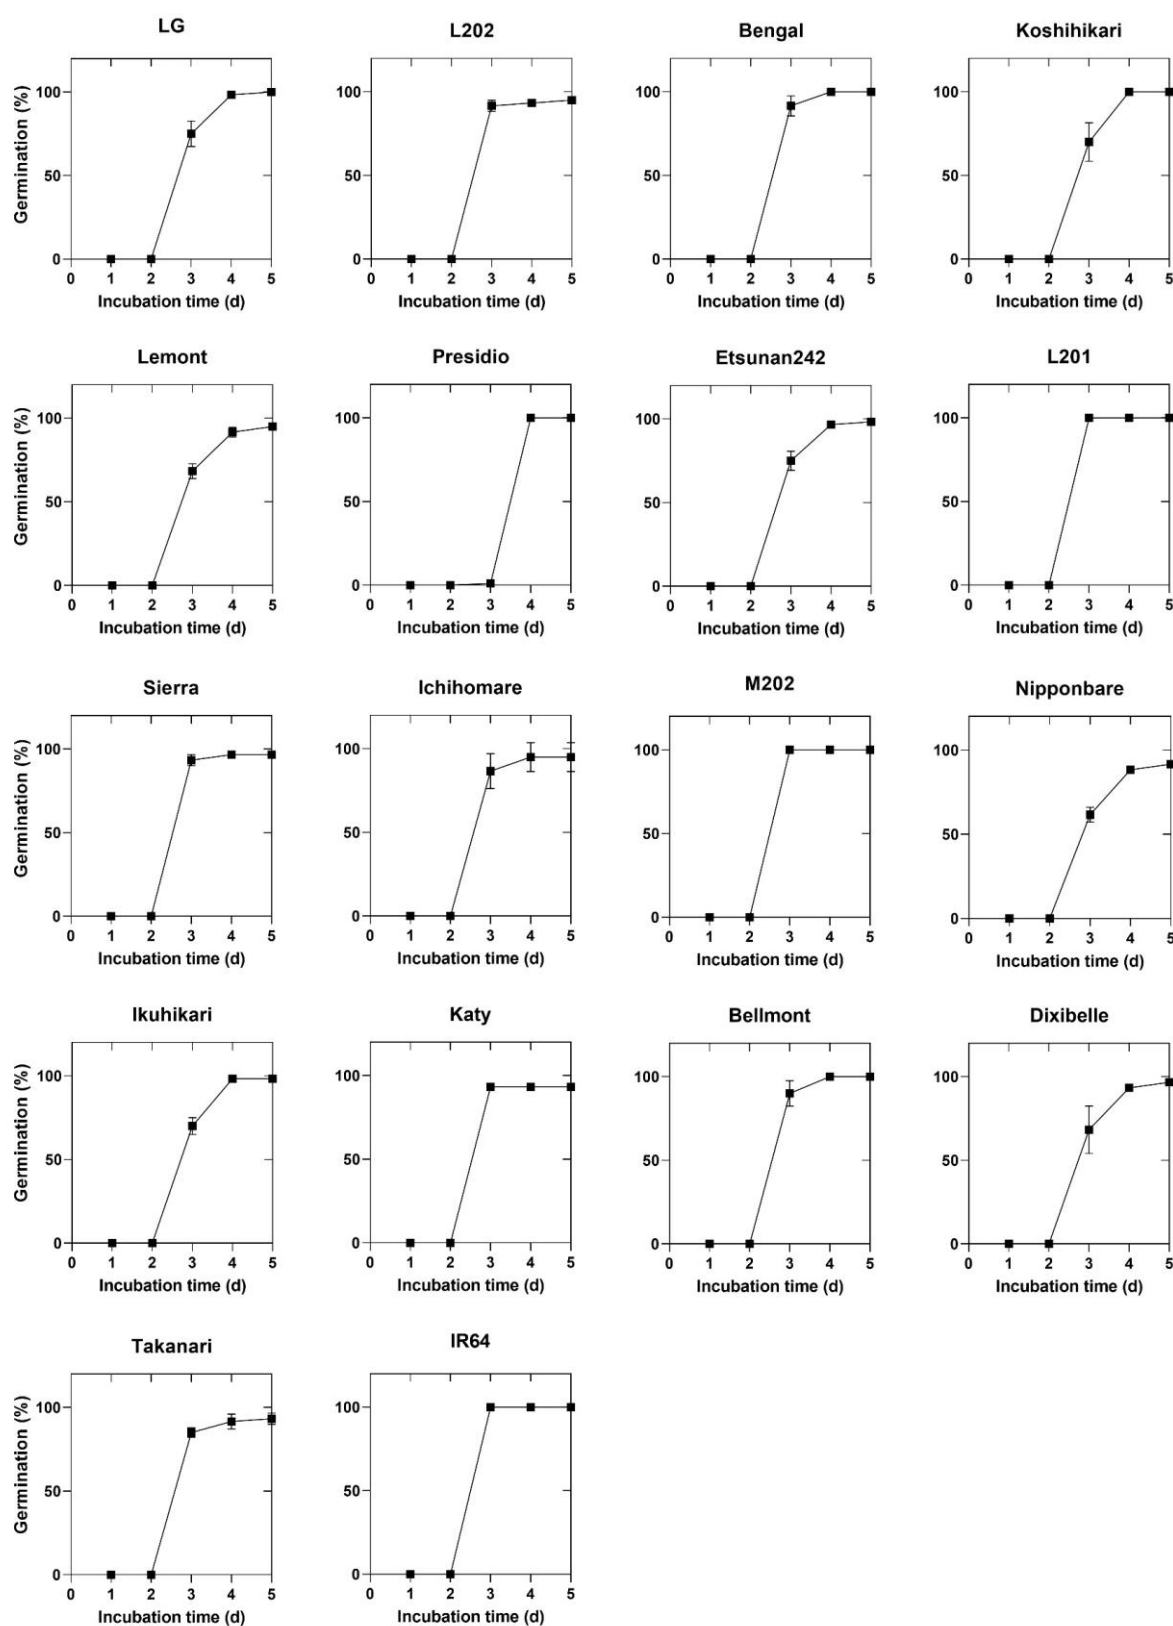

**Figure S1.** Percent germination of 18 rice genotypes under non-stress conditions. Seeds were incubated at 28 °C (12 h light and 12 h dark) for 5 days. The number of germinated seeds was recorded everyday. Data represent means  $\pm$  SE ( $n = 3$ ; 15 seeds per replicate).

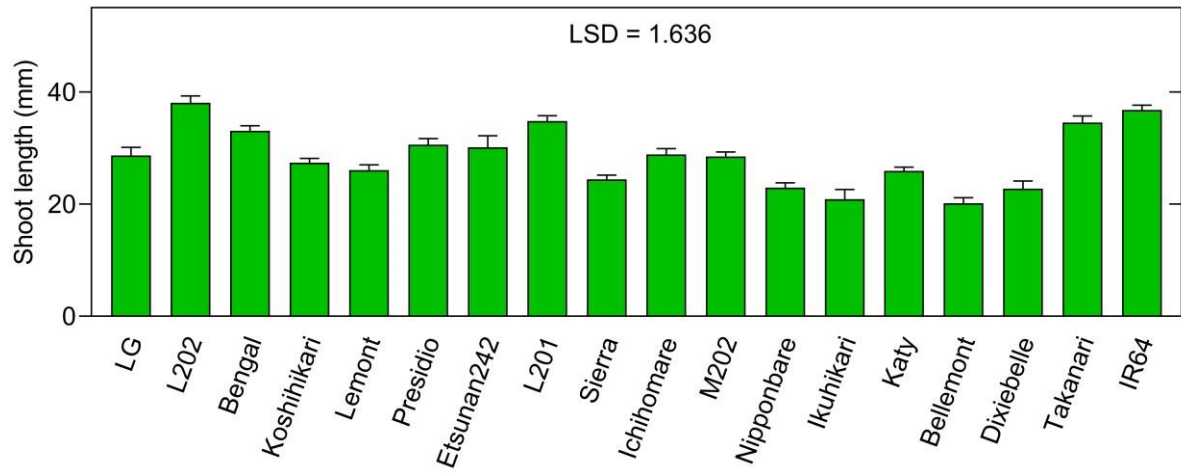

**Figure S2.** Shoot length of 18 rice varieties germinated under anaerobic conditions. Seeds were incubated at 28 °C (12 h light and 12 h dark) for 5 days. Data represent means  $\pm$  SE ( $n = 15$ ). Multiple comparisons of means were performed using ANOVA followed by Fisher's least significant difference (LSD) test.
